# Supplementary material
Source: HighWire-hosted journal article supplement (https://bmjopen.bmj.com/content/13/11/e077427)
Supplement: inline-supplementary-material-1 [file inline-supplementary-material-1.pdf]

|                                     |                                       | Visit 1 (randomisation) | Fortnightly pre-op telephone call | Visit 2: Surgery | Visit 3 (6 months)* | Visit 4 (12 months) | Visit 5 (18 months) | Visit 6 (24 months) | Visit 7 (30 months) | Visit 8 (36 months) | Visit 9 (42 months) | Visit 10 (48 months; End of Intervention phase | 60days after treatment end | Extended follow up phase (60, 72 & 84 months) |
|-------------------------------------|---------------------------------------|-------------------------|-----------------------------------|------------------|---------------------|---------------------|---------------------|---------------------|---------------------|---------------------|---------------------|------------------------------------------------|----------------------------|-----------------------------------------------|
| Clinical assessments and procedures | Data Collection from hospital records | x                       | x                                 | x                | x                   | x                   | x                   | x                   | x                   | x                   | x                   | x                                              | x                          | x                                             |
|                                     | CT (thorax/abdomen/pelvis)            |                         |                                   | x*               | x                   | x                   | x                   | x                   |                     | x                   |                     | x                                              |                            |                                               |
|                                     | Body Weight                           | x                       |                                   | x                | x                   | x                   | x                   | x                   | x                   | x                   | x                   | x                                              |                            |                                               |
|                                     | Adverse event assessment              |                         | x                                 | x                | x                   | x                   | x                   | x                   | x                   | x                   | x                   | x                                              | x                          |                                               |
|                                     | Concomitant medications               | x                       | x                                 | x                | x                   | x                   | x                   | x                   | x                   | x                   | x                   | x                                              |                            |                                               |
|                                     | Compliance monitoring                 |                         | x                                 | x                | x                   | x                   | x                   | x                   | x                   | x                   | x                   | x                                              |                            |                                               |
|                                     | Participant Questionnaire Pack        | x                       |                                   | x                | x                   | x                   | x                   | x                   | x                   | x                   | x                   | x                                              |                            |                                               |
|                                     | Pregnancy test                        | x                       |                                   |                  |                     |                     |                     |                     |                     |                     |                     |                                                |                            |                                               |
|                                     | Blood sample for fatty acid levels    | x                       |                                   | x                | x                   |                     |                     |                     |                     |                     |                     |                                                |                            |                                               |
|                                     | Biospecimen collection (optional)     | x                       |                                   | x                | x                   | x                   | x                   | x                   | x                   | x                   | x                   | x                                              |                            |                                               |
| Trial interventions                 | Randomisation                         | x                       |                                   |                  |                     |                     |                     |                     |                     |                     |                     |                                                |                            |                                               |
|                                     | IMP dispensing                        | x                       |                                   | x                | x                   | x                   | x                   | x                   | x                   | x                   | x                   |                                                |                            |                                               |

\*In the event that macroscopic tumour remains following liver resection and curative treatment is not possible, a CT scan is carried out as soon as possible to measure the extent of existing disease.

Supplementary Figure 1
