# Supplementary material
Source: HighWire-hosted journal article supplement (https://bmjopen.bmj.com/content/13/11/e077427)
Supplement: inline-supplementary-material-2 [file inline-supplementary-material-2.pdf]

**A randomised, placebo-controlled, phase 3 trial of the effect of the omega-3 polyunsaturated fatty acid eicosapentaenoic acid (EPA) on colorectal cancer recurrence and survival after surgery for resectable liver metastases: EPA for Metastasis Trial 2 (EMT2) [ClinicalTrials.gov NCT032428477]**

**Supplementary Data**

|                                                      | Page |
|------------------------------------------------------|------|
| 1. List of sites recruiting to EMT2                  | 2    |
| 2. Substantial Amendments to the EMT2 trial protocol | 3    |
| 3. Independent members of the Oversight Committees   | 5    |

**List of sites recruiting to EMT2**

| Site name                                                                               | Date open for recruitment |
|-----------------------------------------------------------------------------------------|---------------------------|
| <b>Basingstoke</b> (Hampshire Hospitals NHS Foundation Trust)                           | 21/3/2018                 |
| <b>Birmingham</b> (University Hospitals Birmingham NHS Trust)                           | 20/7/2018                 |
| <b>Cambridge</b> (Cambridge University Hospitals NHS Foundation Trust)                  | 30/10/2019                |
| <b>Cardiff</b> (University Hospital of Wales, Cardiff and Vale University Health Board) | 22/6//2020                |
| <b>Leeds</b> (Leeds Teaching Hospitals NHS Trust)                                       | 9/5/2018                  |
| <b>Liverpool</b> (Liverpool University Hospitals NHS Foundation Trust)                  | 21/3/2019                 |
| <b>London</b> (King's College Hospital NHS Foundation Trust)                            | 4/8/2020                  |
| <b>London</b> (Royal Free London NHS Foundation Trust)                                  | 14/10/2019                |
| <b>Newcastle</b> (Newcastle upon Tyne Hospitals NHS Foundation Trust)                   | 28/8/2019                 |
| <b>Nottingham</b> (Nottingham University Hospitals NHS Trust)                           | 5/12/2018                 |
| <b>Oxford</b> (Oxford University Hospitals NHS Foundation Trust)                        | 29/6/2022                 |
| <b>Sheffield</b> (Sheffield Teaching Hospitals NHS Foundation Trust)                    | 11/9/2018                 |
| <b>Southampton</b> (University Hospital Southampton NHS Foundation Trust)               | 16/3/2018                 |

**Substantial amendments to the EMT2 trial protocol**

| <b>Substantial amendment (SA)</b> | <b>Protocol version (submission date)</b> | <b>Reason for the amendment<sup>1</sup></b>                                                                                                                                                                                                                                                                                                                                                                                                          |
|-----------------------------------|-------------------------------------------|------------------------------------------------------------------------------------------------------------------------------------------------------------------------------------------------------------------------------------------------------------------------------------------------------------------------------------------------------------------------------------------------------------------------------------------------------|
| 01                                | 2.0 (21/4/2017)                           | Use of a new IMP <sup>2</sup> (IPE [active] and mineral oil [placebo] capsules) after approval for use of the IMP (90% EPA triglyceride) used in the seAFOod trial <sup>3</sup> was not granted by MHRA.                                                                                                                                                                                                                                             |
| 02                                | v3.0 (3/6/20217)                          | Clarifications in relation to pharmacovigilance measures requested by MHRA.                                                                                                                                                                                                                                                                                                                                                                          |
| 05                                | v4.0 (23/8/2018)                          | Addition of 'remote' (telephone) follow-up and IMP delivery for participants who are unable to attend the recruiting centre for in-person assessment.                                                                                                                                                                                                                                                                                                |
| 06                                | v5.0 (26/2/2019)                          | Change of eligibility criteria to remove the stipulation that IMP treatment begins more than 2 weeks before liver resection surgery.<br>Addition of exclusion criterion if current liver metastatic disease has already been treated partially by liver resection surgery.<br>Amendment to allow optional dispensing of IMP at visit 2.                                                                                                              |
| 12                                | v6.0 (13/1/2021)                          | Inclusion of the option for EMT2 participants to join a translational study to provide stool, blood, urine and tumour tissue for laboratory studies (EMT2 Biospecimen study)                                                                                                                                                                                                                                                                         |
| 14                                | v7.0 (25/5/2021)                          | Urgent Safety Measure - amendment to exclude participants with known soya or peanut allergy and add this to the exclusion criteria for trial screening prompted by guidance in the SmPC for Vazkepa™.<br><br>Amendment of the protocol and PISICF to 1) describe atrial fibrillation risk associated with high-dose omega-3 fatty acids and 2) increase emphasis on increased risk of bleeding in individuals on concomitant anti-thrombotic agents. |
| 15                                | v8.0 (2/11/2021)                          | Change of the Reference Safety Information from an Investigator Brochure to the SmPC for Vazkepa™.                                                                                                                                                                                                                                                                                                                                                   |
| 16                                | v9.0 (9/9/2022)                           | Amendment of sample size estimate and recruitment rate projection.<br>Addition of 'remote' follow-up of participant health care records once IMP is stopped.                                                                                                                                                                                                                                                                                         |

<sup>1</sup>Only Substantial Amendments to the Protocol are listed. Other Substantial Amendments were for addition of new research sites, amendment of the PISICF and use of a trial-specific website.

<sup>2</sup>Abbreviations: EPA, eicosapentaenoic acid; IMP, Investigative Medicinal Product; IPE, icosapent ethyl; MHRA, Medicines and Healthcare Regulatory Agency; PISICF, Patient Information Sheet and Informed Consent Form; SmPC, Summary of Product Characteristics

<sup>3</sup>The IMP used in the latter stages of the seAFOod polyp prevention trial was soft-gel capsules containing 90% EPA triglyceride (active) or capric/caprylic acids (placebo) – see *Trials* 2013;**14**:237.

**Independent members of the Oversight Committees****Trial Steering Committee**

Professor Richard Wilson (Chair), University of Glasgow

Professor Louise Brown, University College, London

Professor Vicky Coyle, Queen's University, Belfast

Professor Nick Maynard, Oxford University Hospitals NHS Trust

Patient & Public Representative (details available on request with consent)

Yorkshire Cancer Research (Observer)

**Data Monitoring Committee**

Professor Robert Steele (Chair), University of Dundee

Professor John Norrie, University of Edinburgh

Professor Christopher Byrne, University of Southampton
