# Supplementary material
Source: HighWire-hosted journal article supplement (https://bmjopen.bmj.com/content/13/11/e077427)
Supplement: inline-supplementary-material-4 [file inline-supplementary-material-4.pdf]

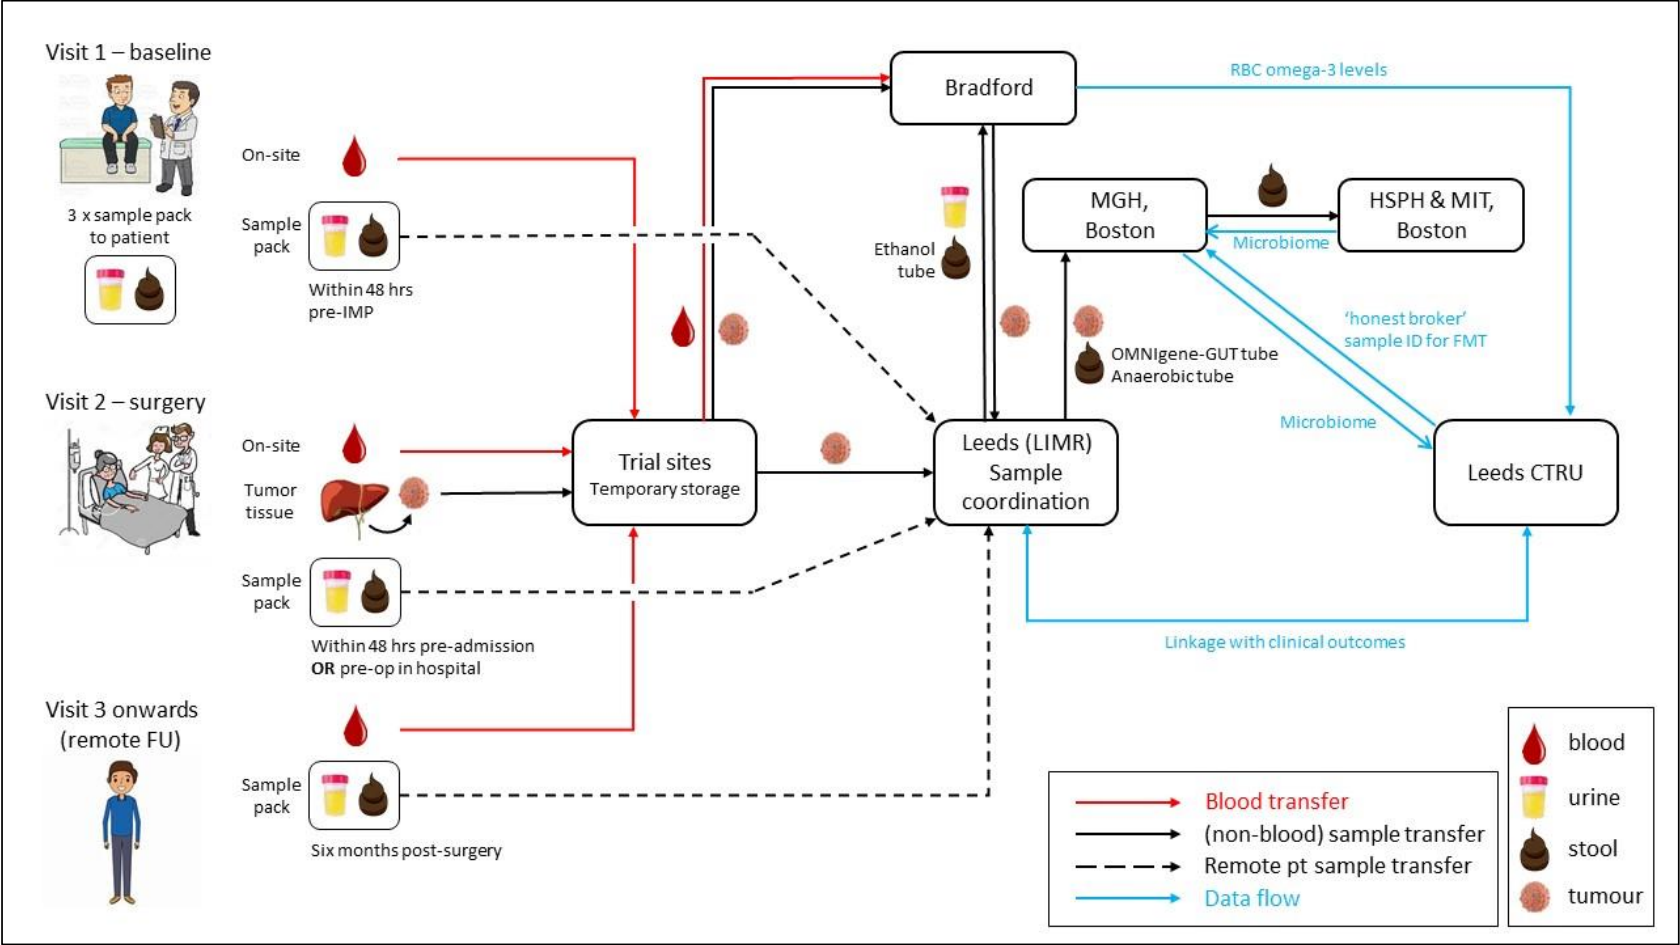

**Supplementary Figure 3. Biospecimen and linked data flow during the EMT2 trial.** Remote sample transfer from participants to the Leeds Biobank was by Royal Mail Safebox™. Linkage of EMT2 trial outcomes required for design of faecal microbial transplant (FMT) experiments was co-ordinated by the Safety Statistician for EMT2 in order to avoid any disruption of the double-blind for EMT2. CTRU, Clinical Trials Research Unit; HSPH, Harvard School of Public Health; LIMR, Leeds Institute of Medical Research; MGH, Massachussets General Hospital; MIT, Massachussets Institute of Technology.
